# Supplementary material for: Surveillance of Safety of 3 Doses of COVID-19 mRNA Vaccination Using Electronic Health Records
Source: PubMed Central journal article supplement — JAMA Netw Open. 2022 Apr 14;5(4):e227038. doi: 10.1001/jamanetworkopen.2022.7038 (PMC9011130; doi:10.1001/jamanetworkopen.2022.7038), 2022-04-14
Supplement: jamanetwopen-e227038-s001.pdf [file jamanetwopen-e227038-s001.pdf]

## Supplemental Online Content

Niesen MJM, Pawlowski C, O'Horo JC, et al. Surveillance of safety of 3 doses of COVID-19 mRNA vaccination using electronic health records. *JAMA Netw Open*. 2022;5(4):e227038. doi:10.1001/jamanetworkopen.2022.7038

**eAppendix.** Race and Ethnicity Database Options

**eFigure 1.** Distribution of Time Between Vaccine Doses

**eFigure 2.** Prevalence of Vaccine-Associated Adverse Events During 14-Day Periods Before and After Vaccination With 3 Doses

**eFigure 3.** Emergency Department Visits Within 2 Days of Vaccine Dose

**eFigure 4.** Prevalence of Vaccine-Associated Adverse Events During 14-Day Periods Before and After Vaccination With 1 Dose

**eTable 1.** Tracked Adverse Events by Time Window for 3-Dose BNT162b2 Cohort

**eTable 2.** Tracked Adverse Events by Time Window for 3-Dose mRNA-1273 Cohort

This supplemental material has been provided by the authors to give readers additional information about their work.

## **eAppendix.** Race and Ethnicity Database Options

### **Race:**

These are the race options as they appeared in the EHR database, grouped as was done in Table 1:

Table 1 category: [list of options]

Asian: ['Asian', 'Asian Cambodian', 'Asian Chinese', 'Asian Filipino', 'Asian Indian', 'Asian Japanese', 'Asian Korean', 'Asian Laotian', 'Asian Other', 'Asian Pakistani', 'Asian Taiwanese', 'Asian Thai', 'Asian Vietnamese']

Black or African American: ['African', 'African American', 'American born African', 'Black or African American', 'Black or African American Other', 'Caribbean Black']

American Indian: ['American Indian/Alaskan Native', 'American Indian/Alaskan Native Alaska region native', 'American Indian/Alaskan Native Eastern region', 'American Indian/Alaskan Native Northern Plains region native', 'American Indian/Alaskan Native Pacific Coast region native', 'American Indian/Alaskan Native South West region native', 'American Indian/Alaskan Native Southern Plains region native']

Native Hawaiian or Pacific Islander: ['Guamanian or Chamorro', 'Native Hawaii/Pacific Islander', 'Native Hawaiian', 'Other Pacific Islander', 'Samoan']

White or Caucasian: ['White']

Other: ['Other', 'Unable to Provide']

Unknown: ['Choose Not to Disclose', 'Unknown', none]

### **Ethnicity:**

These are the ethnicity options as they appeared in the EHR database, grouped as done in Table 1:

Table 1 category: [list of options]

Hispanic or Latino: ['Central American', 'Cuban', 'Hispanic or Latino', 'Mexican', 'Other Spanish culture of origin regardless of race (except Spain)', 'Puerto Rican', 'South American']

Not hispanic or Latino: ['Not Hispanic or Latino']

Unknown: ['Choose Not to Disclose', 'Unable to Provide', 'Unknown', None]

**a. Time between vaccine doses for 3-dose BNT162b2 recipients (N = 38,094)**

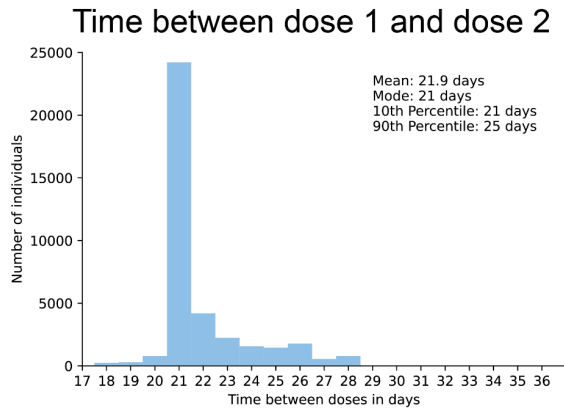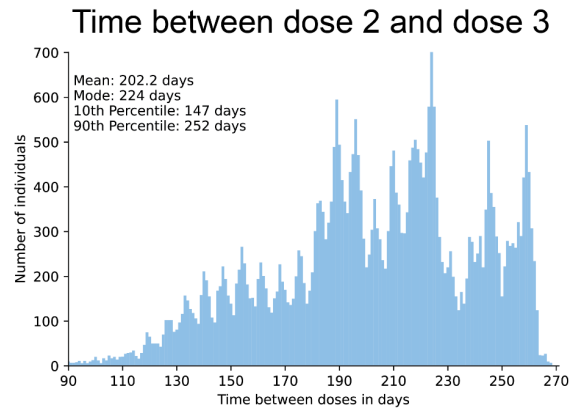

**b. Time between vaccine doses for 3-dose mRNA-1273 recipients (N = 9,905)**

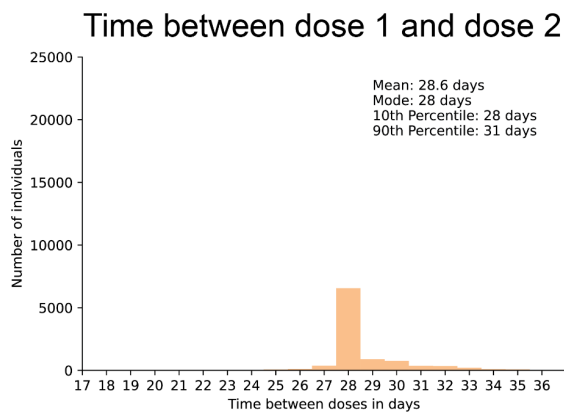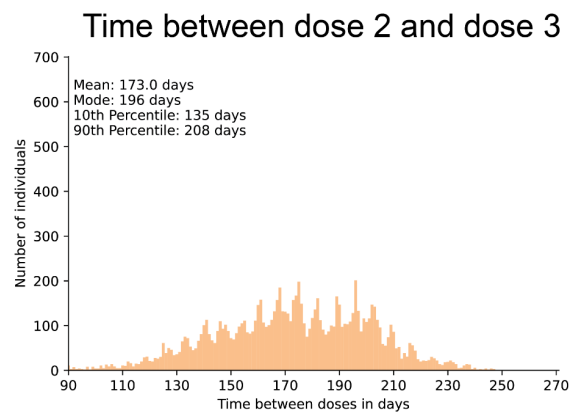

**eFigure 1.** Distribution of Time Between Vaccine Doses

**a. Adverse events in 3-dose BNT162b2 vaccinated individuals (N = 38,094)**

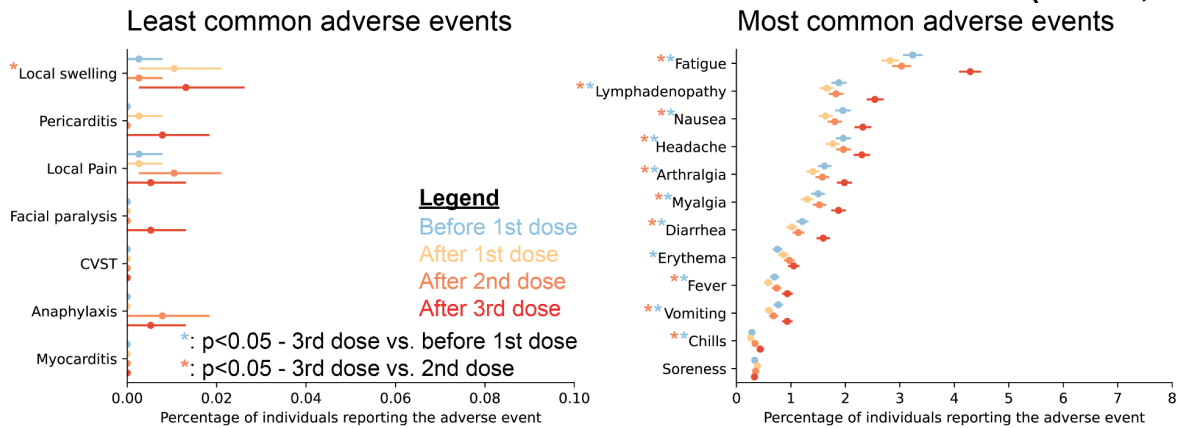

**b. Adverse events in 3-dose mRNA-1273 vaccinated individuals (N = 9,905)**

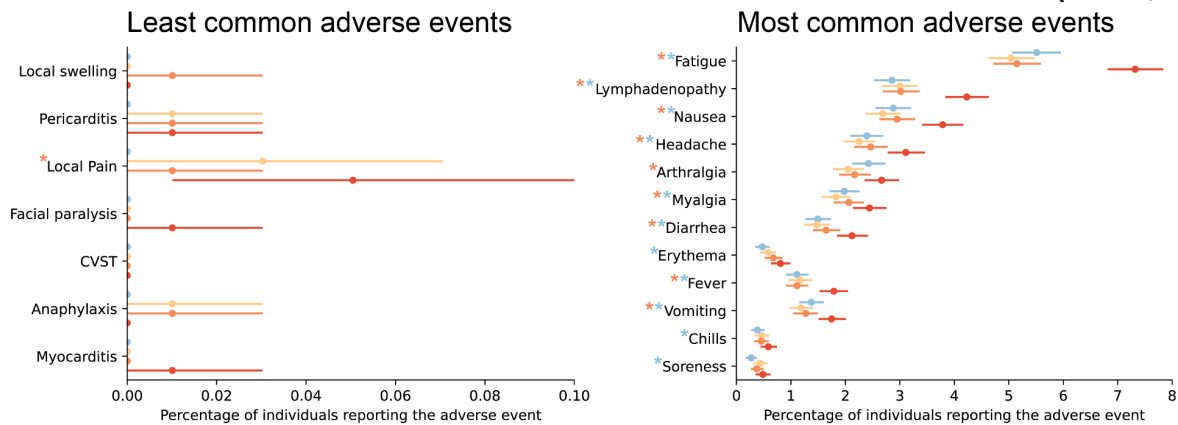

**eFigure 2.** Prevalence of Vaccine-Associated Adverse Events During 14-Day Periods Before and After Vaccination With 3 Doses

(a) Adverse events reported in individuals that received three doses of BNT162b2, before 1<sup>st</sup> dose (blue), after 1<sup>st</sup> dose (yellow), after 2<sup>nd</sup> dose (orange), and after 3<sup>rd</sup> dose (red). (b) Adverse events reported in individuals that received three doses of mRNA-1273, before 1<sup>st</sup> dose (blue), after 1<sup>st</sup> dose (yellow), after 2<sup>nd</sup> dose (orange), and after 3<sup>rd</sup> dose (red). Error bars indicate 95% confidence intervals, and asterisks indicate adverse events with significant (paired t-test p-value < 0.05) difference in prevalence after the 3<sup>rd</sup> dose, compared with before the 1<sup>st</sup> dose (blue asterisk) or after the 2<sup>nd</sup> dose (orange asterisk). CVST, cerebral venous sinus thrombosis.

## Emergency Department visits within 2 days of a vaccine dose

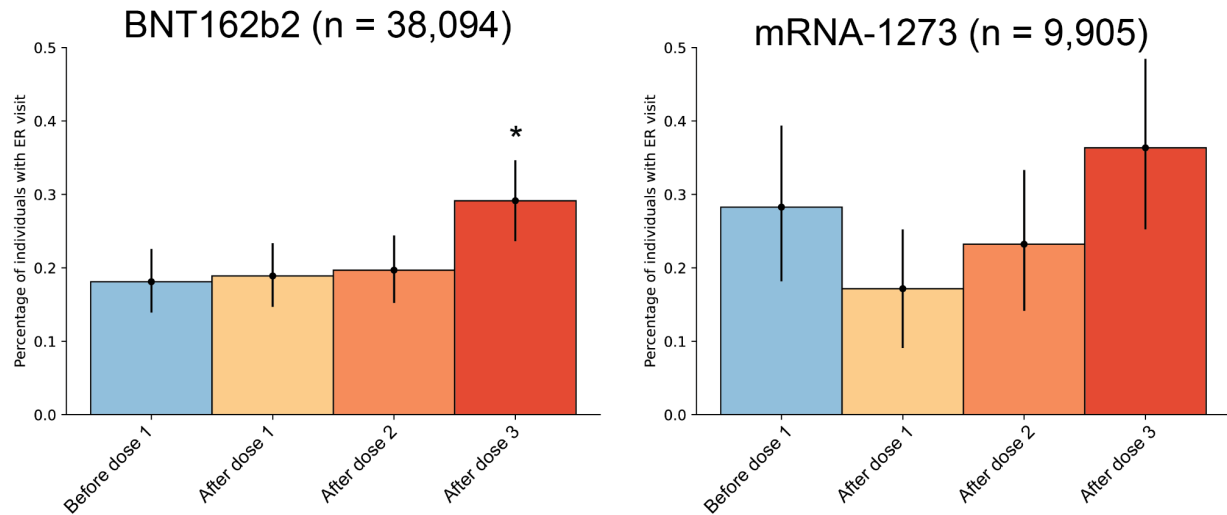

**eFigure 3.** Emergency Department Visits Within 2 Days of Vaccine Dose

The percentage of 3-dose mRNA vaccine recipients that visited the emergency department within 2 days after the 1<sup>st</sup> dose (yellow), 2<sup>nd</sup> dose (orange), or 3<sup>rd</sup> dose (red), compared with a 2-day period, starting 14-days before their 1<sup>st</sup> dose (blue). Error bars indicate 95% confidence intervals, and asterisks indicate a significant (two-tailed p-value < 0.05) difference in emergency department visits after vaccination compared with before.

**a. Adverse events in 1-dose BNT162b2 vaccinated individuals (N = 18,288)**

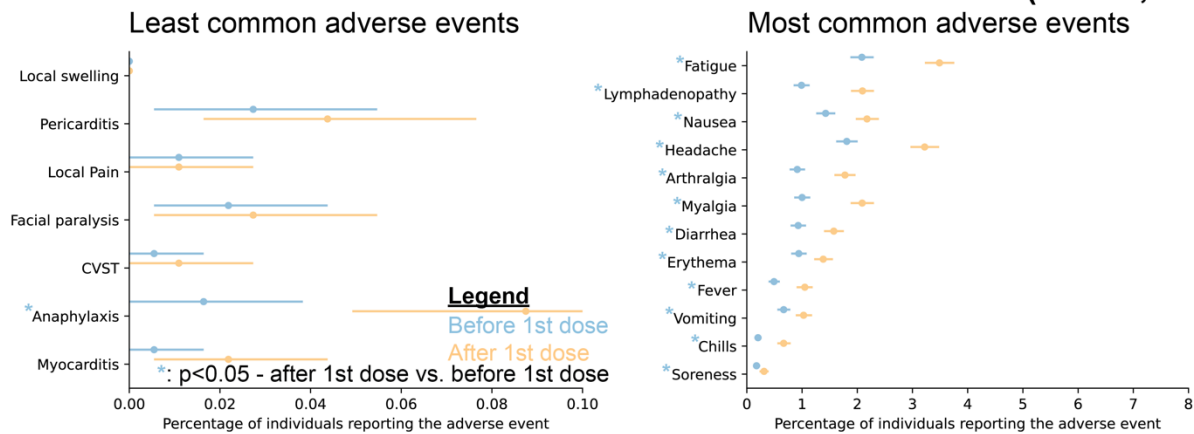

**b. Adverse events in 1-dose mRNA-1273 vaccinated individuals (N = 18,620)**

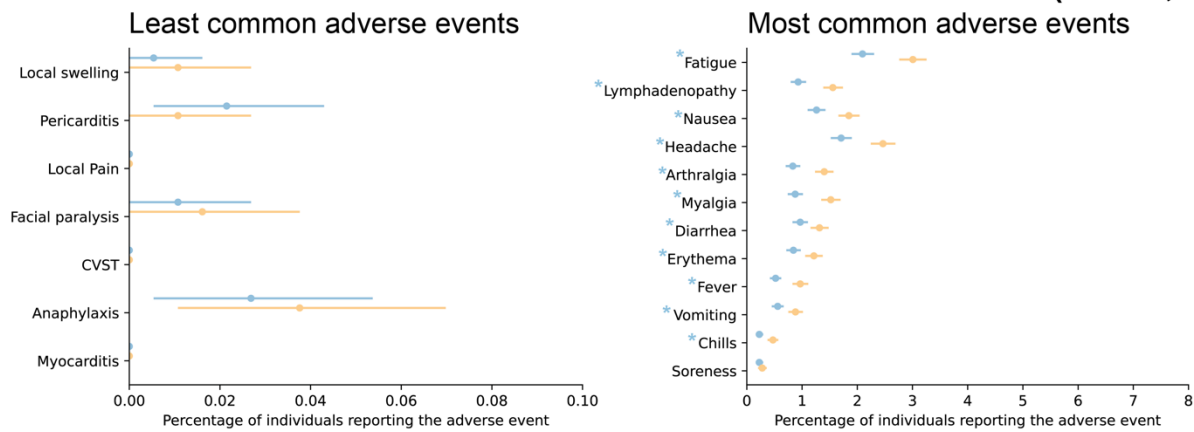

**eFigure 4.** Prevalence of Vaccine-Associated Adverse Events During 14-Day Periods Before and After Vaccination With 1 Dose

(a) Adverse events reported in individuals that received only one dose of BNT162b2, before (blue) and after (yellow) 1<sup>st</sup> dose. (b) Adverse events reported in individuals that received only one dose of mRNA-1273, before (blue) and after (yellow) 1<sup>st</sup> dose. Error bars indicate 95% confidence intervals, and asterisks indicate adverse events with significant (two-tailed p-value < 0.05) difference in prevalence after vaccination compared with before (blue asterisk). CVST, cerebral venous sinus thrombosis.

| Adverse event    | #reports after 1 <sup>st</sup> dose of BNT162b2 | Median days between 1 <sup>st</sup> dose and report | #reports after 2 <sup>nd</sup> dose of BNT162b2 | Median days between 2 <sup>nd</sup> dose and report | #reports after 3 <sup>rd</sup> dose of BNT162b2 | Median days between 3 <sup>rd</sup> dose and report | #reports before 1 <sup>st</sup> dose of BNT162b2 |
|------------------|-------------------------------------------------|-----------------------------------------------------|-------------------------------------------------|-----------------------------------------------------|-------------------------------------------------|-----------------------------------------------------|--------------------------------------------------|
| Anaphylaxis      | 0                                               | not reported                                        | 3                                               | 9                                                   | 2                                               | 3.5                                                 | 0                                                |
| Arthralgia       | 534                                             | 6                                                   | 601                                             | 7                                                   | 755                                             | 4                                                   | 616                                              |
| CVST             | 0                                               | not reported                                        | 0                                               | not reported                                        | 0                                               | not reported                                        | 0                                                |
| Chills           | 100                                             | 8                                                   | 130                                             | 6                                                   | 166                                             | 6                                                   | 108                                              |
| Diarrhea         | 386                                             | 7                                                   | 432                                             | 6                                                   | 607                                             | 5                                                   | 461                                              |
| Erythema         | 328                                             | 7                                                   | 369                                             | 6                                                   | 400                                             | 6                                                   | 287                                              |
| Facial paralysis | 0                                               | not reported                                        | 0                                               | not reported                                        | 2                                               | 6.5                                                 | 0                                                |
| Fatigue          | 1,074                                           | 7                                                   | 1,155                                           | 7                                                   | 1635                                            | 4                                                   | 1233                                             |
| Fever            | 222                                             | 7.5                                                 | 281                                             | 7                                                   | 356                                             | 6                                                   | 266                                              |
| Headache         | 674                                             | 7                                                   | 748                                             | 6                                                   | 877                                             | 5                                                   | 747                                              |
| Local pain       | 1                                               | 8                                                   | 4                                               | 4                                                   | 2                                               | 3.5                                                 | 1                                                |
| Local swelling   | 4                                               | 4                                                   | 1                                               | 2                                                   | 5                                               | 4                                                   | 1                                                |
| Lymphadenopathy  | 632                                             | 7                                                   | 696                                             | 7                                                   | 968                                             | 3                                                   | 716                                              |
| Myalgia          | 494                                             | 6                                                   | 580                                             | 7                                                   | 714                                             | 4                                                   | 571                                              |
| Myocarditis      | 0                                               | not reported                                        | 0                                               | not reported                                        | 0                                               | not reported                                        | 0                                                |
| Nausea           | 623                                             | 7                                                   | 687                                             | 7                                                   | 884                                             | 6                                                   | 744                                              |
| Pericarditis     | 0                                               | 7                                                   | 0                                               |                                                     | 3                                               | 4                                                   | 0                                                |
| Soreness         | 146                                             | 7                                                   | 134                                             | 7                                                   | 126                                             | 5                                                   | 128                                              |
| Vomiting         | 227                                             | 7                                                   | 259                                             | 7                                                   | 355                                             | 5                                                   | 292                                              |

**eTable 1.** Tracked Adverse Events by Time Window for 3-Dose BNT162b2 Cohort  
CVST, cerebral venous sinus thrombosis.

|                  | #reports after 1 <sup>st</sup> dose of mRNA-1273 | Median days between 1 <sup>st</sup> dose and report | #reports after 2 <sup>nd</sup> dose of mRNA-1273 | Median days between 2 <sup>nd</sup> dose and report | #reports after 3 <sup>rd</sup> dose of mRNA-1273 | Median days between 3 <sup>rd</sup> dose and report | #reports before 1 <sup>st</sup> dose of mRNA-1273 |
|------------------|--------------------------------------------------|-----------------------------------------------------|--------------------------------------------------|-----------------------------------------------------|--------------------------------------------------|-----------------------------------------------------|---------------------------------------------------|
| Anaphylaxis      | 1                                                | 10                                                  | 1                                                | 10                                                  | 0                                                | not reported                                        | 0                                                 |
| Arthralgia       | 203                                              | 7                                                   | 215                                              | 7                                                   | 264                                              | 4                                                   | 240                                               |
| CVST             | 0                                                | not reported                                        | 0                                                | not reported                                        | 0                                                | not reported                                        | 0                                                 |
| Chills           | 46                                               | 7.5                                                 | 45                                               | 6                                                   | 58                                               | 5                                                   | 38                                                |
| Diarrhea         | 146                                              | 6                                                   | 163                                              | 7                                                   | 210                                              | 4.5                                                 | 148                                               |
| Erythema         | 57                                               | 6                                                   | 67                                               | 7                                                   | 80                                               | 5                                                   | 47                                                |
| Facial paralysis | 0                                                | not reported                                        | 0                                                | not reported                                        | 1                                                | 10                                                  | 0                                                 |
| Fatigue          | 499                                              | 6                                                   | 510                                              | 7                                                   | 725                                              | 5                                                   | 546                                               |
| Fever            | 116                                              | 7                                                   | 110                                              | 7                                                   | 177                                              | 3                                                   | 110                                               |
| Headache         | 223                                              | 7                                                   | 244                                              | 7                                                   | 308                                              | 5                                                   | 237                                               |
| Local pain       | 3                                                | 14                                                  | 1                                                | 11                                                  | 5                                                | 5                                                   | 0                                                 |
| Local swelling   | 0                                                | not reported                                        | 1                                                | 4                                                   | 0                                                | not reported                                        | 0                                                 |
| Lymphadenopathy  | 297                                              | 8                                                   | 299                                              | 7                                                   | 419                                              | 3                                                   | 283                                               |
| Myalgia          | 181                                              | 8                                                   | 204                                              | 7                                                   | 242                                              | 3                                                   | 196                                               |
| Myocarditis      | 0                                                | not reported                                        | 0                                                | not reported                                        | 1                                                | 1                                                   | 0                                                 |
| Nausea           | 266                                              | 7                                                   | 292                                              | 7                                                   | 375                                              | 4                                                   | 285                                               |
| Pericarditis     | 1                                                | 12                                                  | 1                                                | 10                                                  | 1                                                | 11                                                  | 0                                                 |
| Soreness         | 43                                               | 7                                                   | 37                                               | 7                                                   | 48                                               | 4                                                   | 27                                                |
| Vomiting         | 117                                              | 6                                                   | 126                                              | 7                                                   | 173                                              | 4                                                   | 136                                               |

**eTable 2.** Tracked Adverse Events by Time Window for 3-Dose mRNA-1273 Cohort  
CVST, cerebral venous sinus thrombosis.
